# Supplementary material for: Heterologous Systemic Prime–Intranasal Boosting Using a Spore SARS-CoV-2 Vaccine Confers Mucosal Immunity and Cross-Reactive Antibodies in Mice as well as Protection in Hamsters
Source: MDPI journal article supplement (doi:10.3390/vaccines10111900), 2022-11-10
Supplement: s1 [file s1]

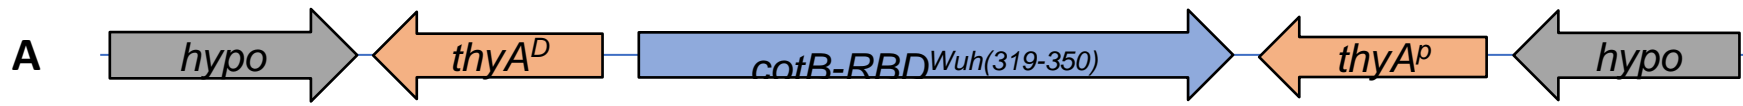

CotB-RBD<sup>Wuh(319-530)</sup> MW = 61.8 kDa.

MSKRRMKYHSNNEISYYNFLHSMKDKIVTVYRGGPESKKGKLTAVKSDYIALQAEKKIIYYQLEHVKSITEDTNNSTTTIETEEMLDADDFHSLIGHLINQSVQFNQGGPESKKGRLVWLGGD  
YAAALNTNEDGVVYFNIHHIKSISKHEPDLKIEEQTPGVLEADDLSEVFKSLTHKWVSINRGGPEAIEGILVDNADGHYTIVKNQEVLRIPFHIKISISLGPKGSYKKEDQKNEQNQEDNNDKD  
SNSFISSKSYSSSKSSKRSKSSDDQSSKSGRSSRSKSSSKSSKRSKSSDYQSSKSGRSSRSKSSSKSSKRSKSSDYQSSKSSKRSRPSRVQPTESIVRFPNITNLCPFGEVFNATRFA  
SVYAWNRKRISNCVADYSVLVNSASFSTFKCYGVSPTKLNDLCFTNVYADSFVIRGDEVQRQIAPGQTGKIADYNYKLPDDFTGCVIAWNSNNLDSKVGGNYNYLYRLFRKSNLKPFERDIST  
EIYQAGSTPCNGVEGFNCYFPLQSYGFQPTNGVGYQPYRVVLSFELLHAPATVCGPKKS

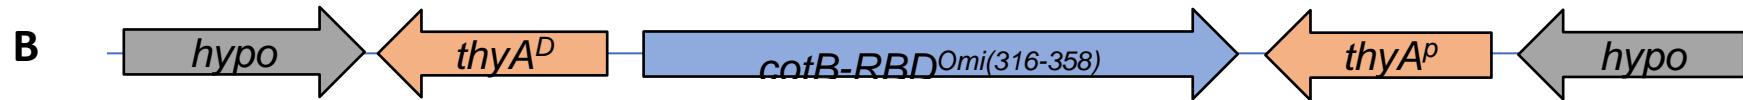

CotB-RBD<sup>Omi(316-538)</sup> MW = 63.36 kDa.

MSKRRMKYHSNNEISYYNFLHSMKDKIVTVYRGGPESKKGKLTAVKSDYIALQAEKKIIYYQLEHVKSITEDTNNSTTTIETEEMLDADDFHSLIGHLINQSVQFNQGGPESKKGRLVWLGGD  
YAAALNTNEDGVVYFNIHHIKSISKHEPDLKIEEQTPGVLEADDLSEVFKSLTHKWVSINRGGPEAIEGILVDNADGHYTIVKNQEVLRIPFHIKISISLGPKGSYKKEDQKNEQNQEDNNDKD  
SNSFISSKSYSSSKSSKRSKSSDDQSSKSGRSSRSKSSSKSSKRSKSSDYQSSKSGRSSRSKSSSKSSKRSKSSDYQSSKSSKRSRPSRVQPTESIVRFPNITNLCPFD<sup>D</sup>EVFNATRFA  
SVYAWNRKRISNCVADYSVLVNL<sup>L</sup>AP<sup>F</sup>FTFKCYGVSPTKLNDLCFTNVYADSFVIRGDEVQRQIAPGQTG<sup>N</sup>IADYNYKLPDDFTGCVIAWNSN<sup>K</sup>LDSKV<sup>S</sup>GNVNYLYRLFRKSNLKPFERDIST  
EIYQAG<sup>NK</sup>PCNGV<sup>A</sup>GFNCYFPL<sup>R</sup>SY<sup>S</sup>FR<sup>P</sup>TYGVGH<sup>H</sup>QPYRVVLSFELLHAPATVCGPKKSTNLVKNKCVNF

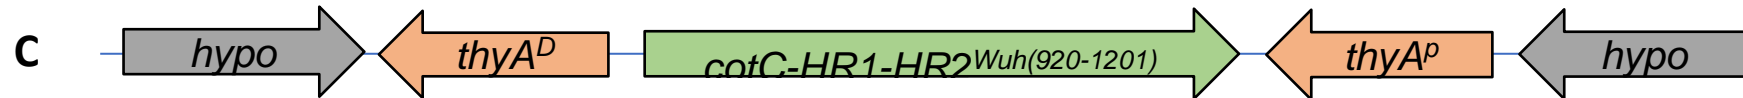

CotC-HR1-HR2<sup>Wuh(920-1201)</sup> MW = 39.87 kDa.

MGYYKKYKEEYYTVKKTYKKYYEYDKKDYDCDYDKKYDDYDKKYDHDKKDYDYVVEYKKHKKHYQKLIANQFN<sup>S</sup>AI<sup>G</sup>KI<sup>Q</sup>DSLS<sup>S</sup>TASALGKLQDVVNQNAQALNTLVKQLSSNFGAIS  
SVLNDILSRDKVEAEVQIDRLITGRLQSLQTYVTQQLIRAAEIRASANLAATKMSECVLGQSKRVDFCGKGYHLMSPQSAPHGVVFLHVTYVPAQEKNFTTAPAICHGKAHFPREGVVF  
SNGTHWFVTQRNFYEPQIITDNTFVSGNCDVVIGIVNNTVYDPLQPELDSFKEELDKYFKNHTSPD<sup>V</sup>DLGDISGINASV<sup>V</sup>NIQKEIDRLNEVAKNLN<sup>E</sup>SLIDLQ

### Supplementary Figure S1: Recombinant Spore Vaccines

Chimeric genes inserted at the *thyA* loci of *B. subtilis* are shown. The Wuhan and Omicron-derived Spike RBD domains were fused in frame to the C-termini of the CotB spore coat protein and the HR1-HR2 domain (Wuhan) of Spike fused in frame to the C-terminus of the CotC spore coat protein. The 15 amino acid changes present in the Omicron RBD variant are highlighted. The Mw of the chimera are shown.

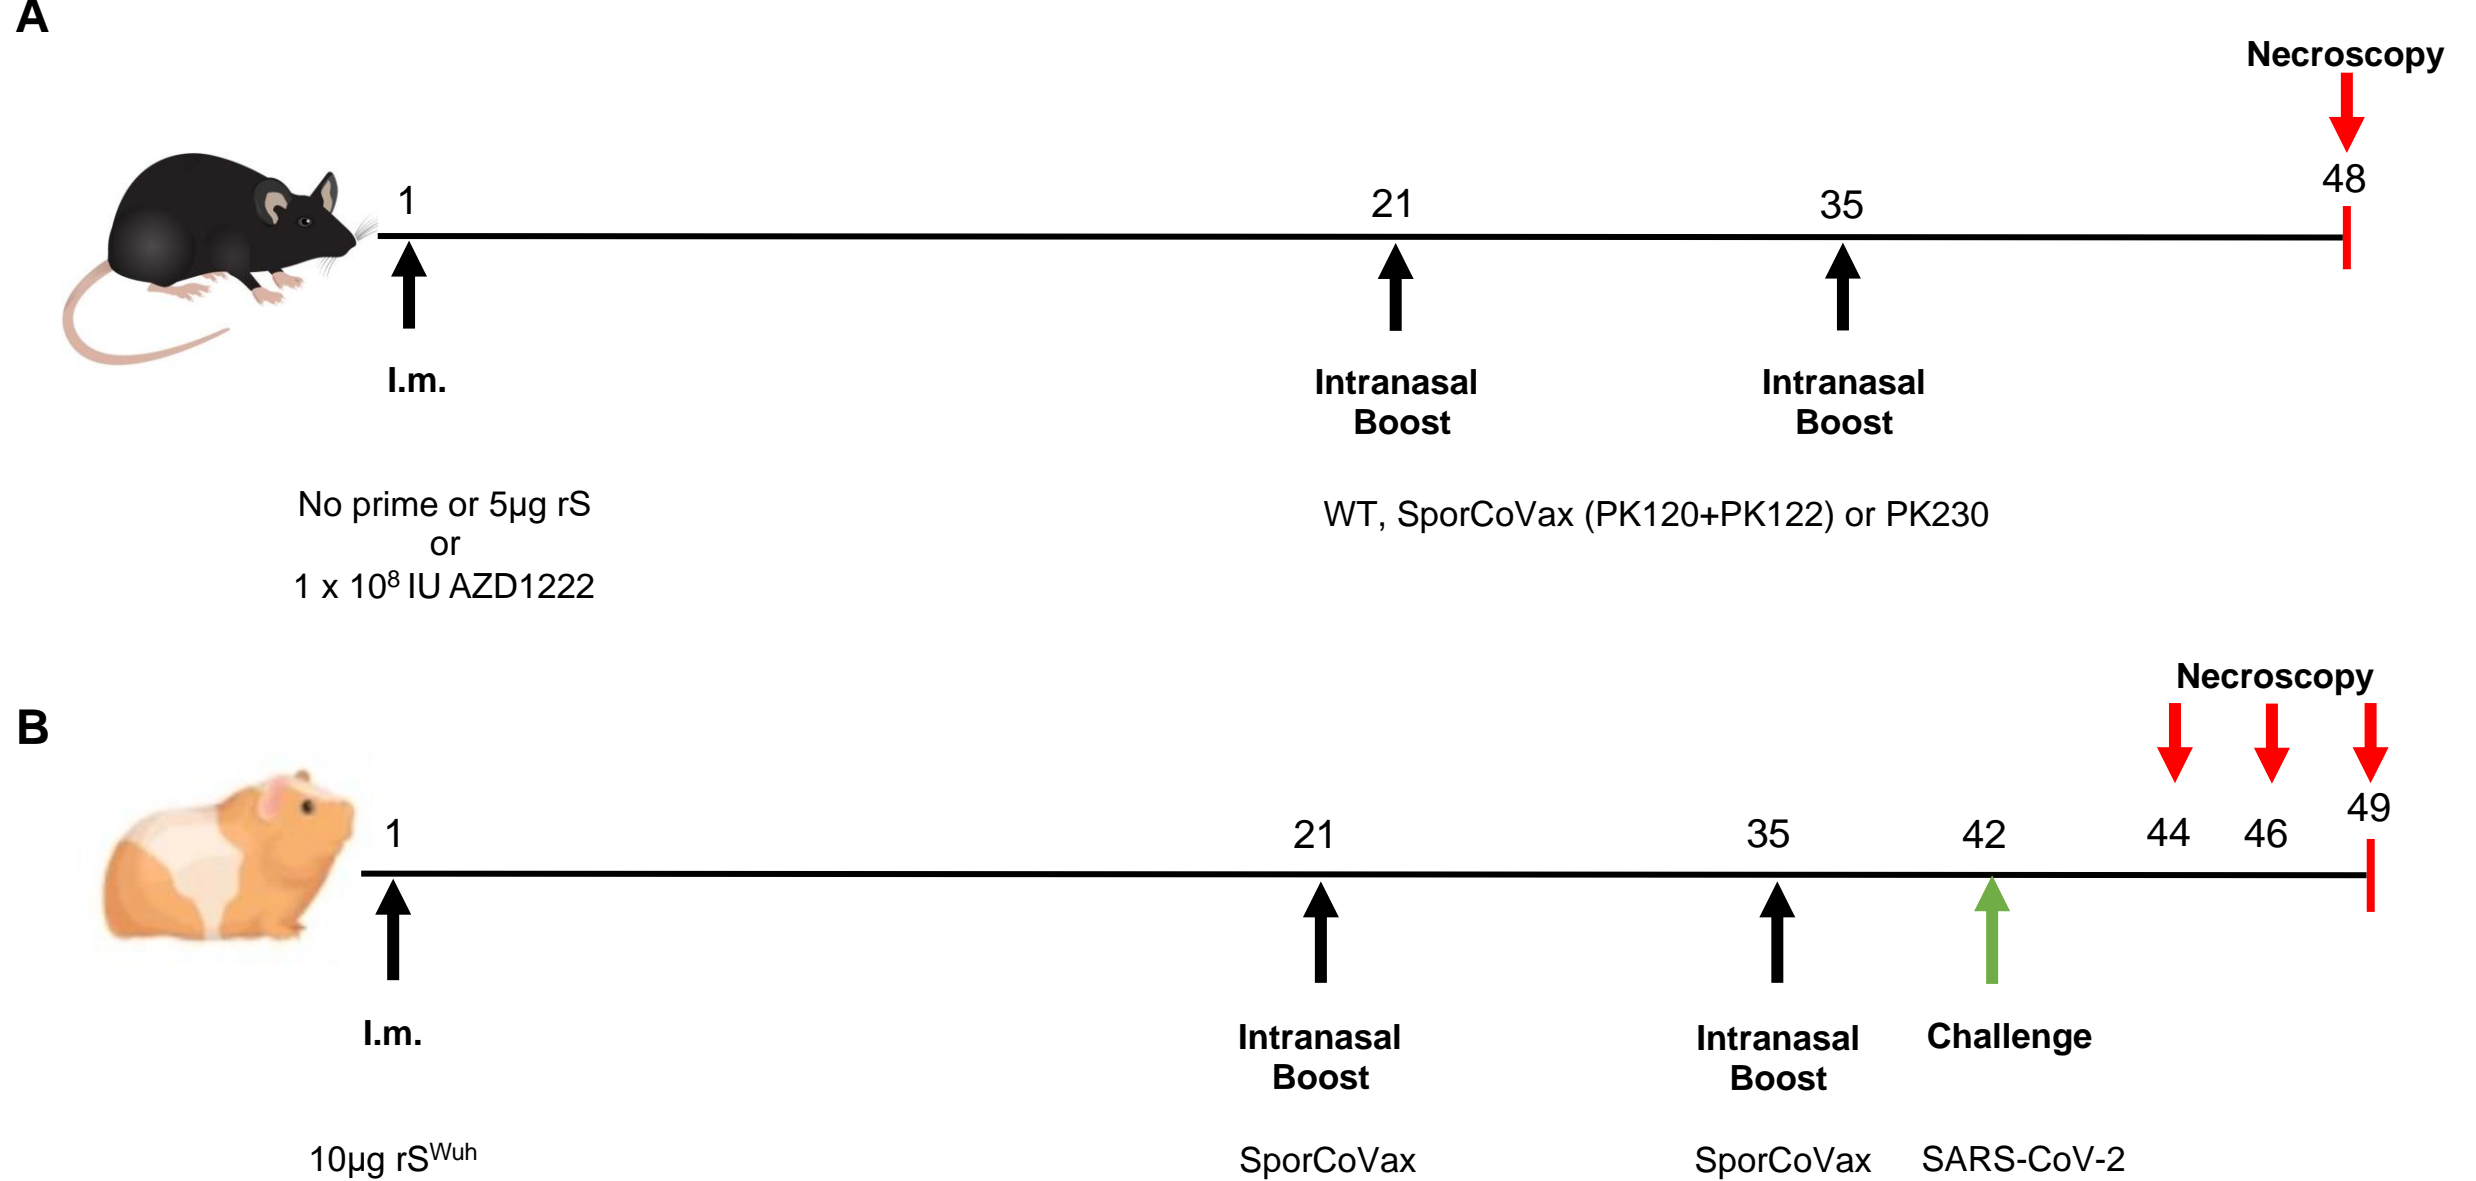

**Supplementary Figure S2: Animal Study Schedules**

For murine immunisations intra-nasal boosts were given three and five weeks after the prime. Each boost consisted of three daily administrations of 10  $\mu$ L/mouse, 5  $\mu$ L/nare). Boost 1, days 21, 22, 23 and Boost 2, days 35, 36, 37). For hamster boosts animals were given a single intranasal dose of 0.1 mL (50  $\mu$ L/nare) three and five weeks post-prime.

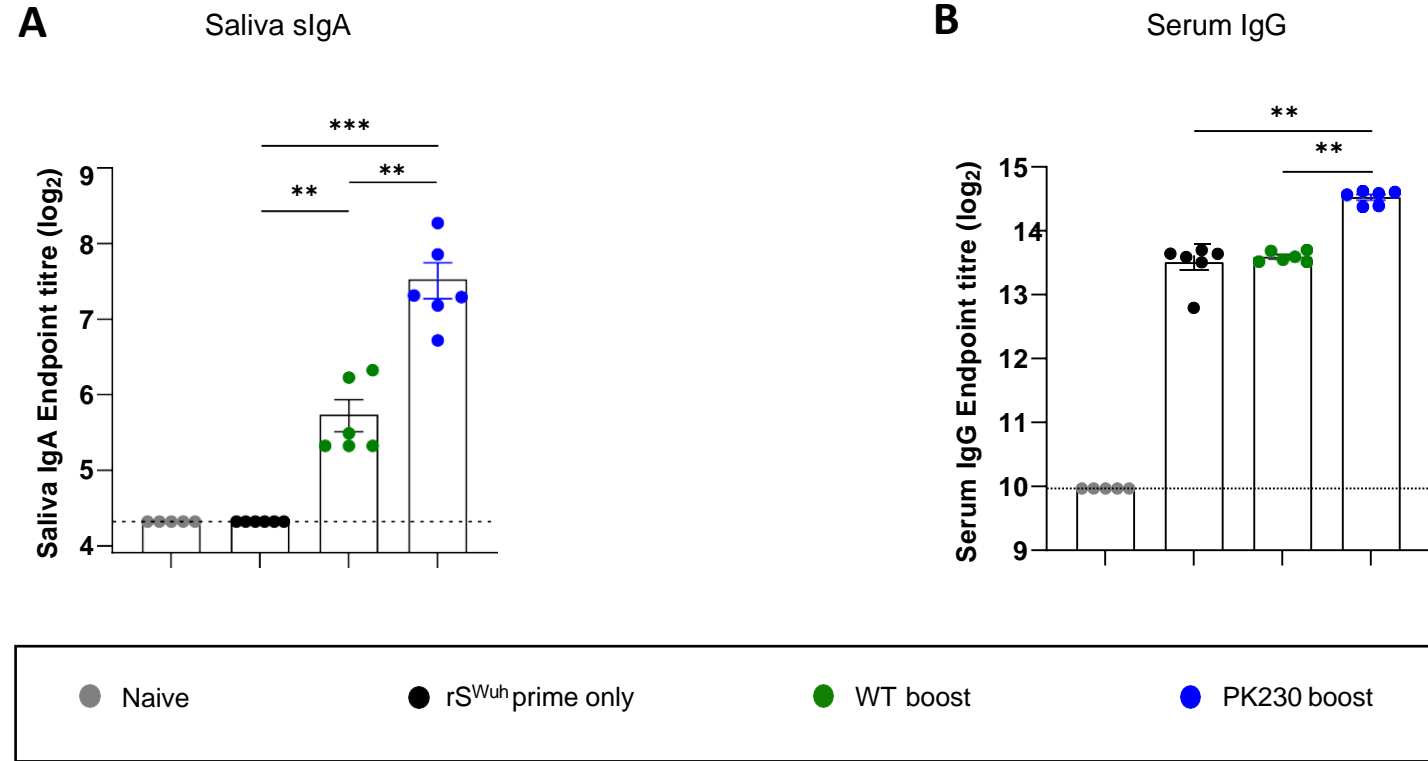

### Supplementary Figure S3: Intranasal Boost of the AZD1222 Vaccine with Spores Expressing Omicron-specific Antigens

Three groups (n=6) of mice (female Balb/c) were primed (i.m.) with the AZD1222 vaccine. Two groups were then boosted (intranasal) with spores ( $5 \times 10^9$  CFU/dose) spores of either WT (naked spores, no antigen expression) or PK230 (CotB-RBD<sup>Omi</sup>) at 21 and 35-days post-prime. Panels show rS<sup>Omi</sup>-specific responses determined by ELISA ( $OD_{450nm}$ ) 48-days post-immunization. **Panel A)** rS<sup>Omi</sup>-specific sIgA in longitudinal saliva samples, **B)** rS<sup>Omi</sup>-specific IgG in serum. Significance was tested using a two-tailed Mann-Whitney U test, \*\* $p < 0.01$ , \*\*\* $p < 0.001$
